# Supplementary material for: Regional cerebral effects of ketone body infusion with 3-hydroxybutyrate in humans: Reduced glucose uptake, unchanged oxygen consumption and increased blood flow by positron emission tomography. A randomized, controlled trial
Source: PubMed Central journal article supplement (PMC5830038; doi:10.1371/journal.pone.0190556), 2018-02-28

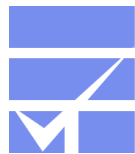

# CONSORT

TRANSPARENT REPORTING of TRIALS

## CONSORT 2010 Flow Diagram

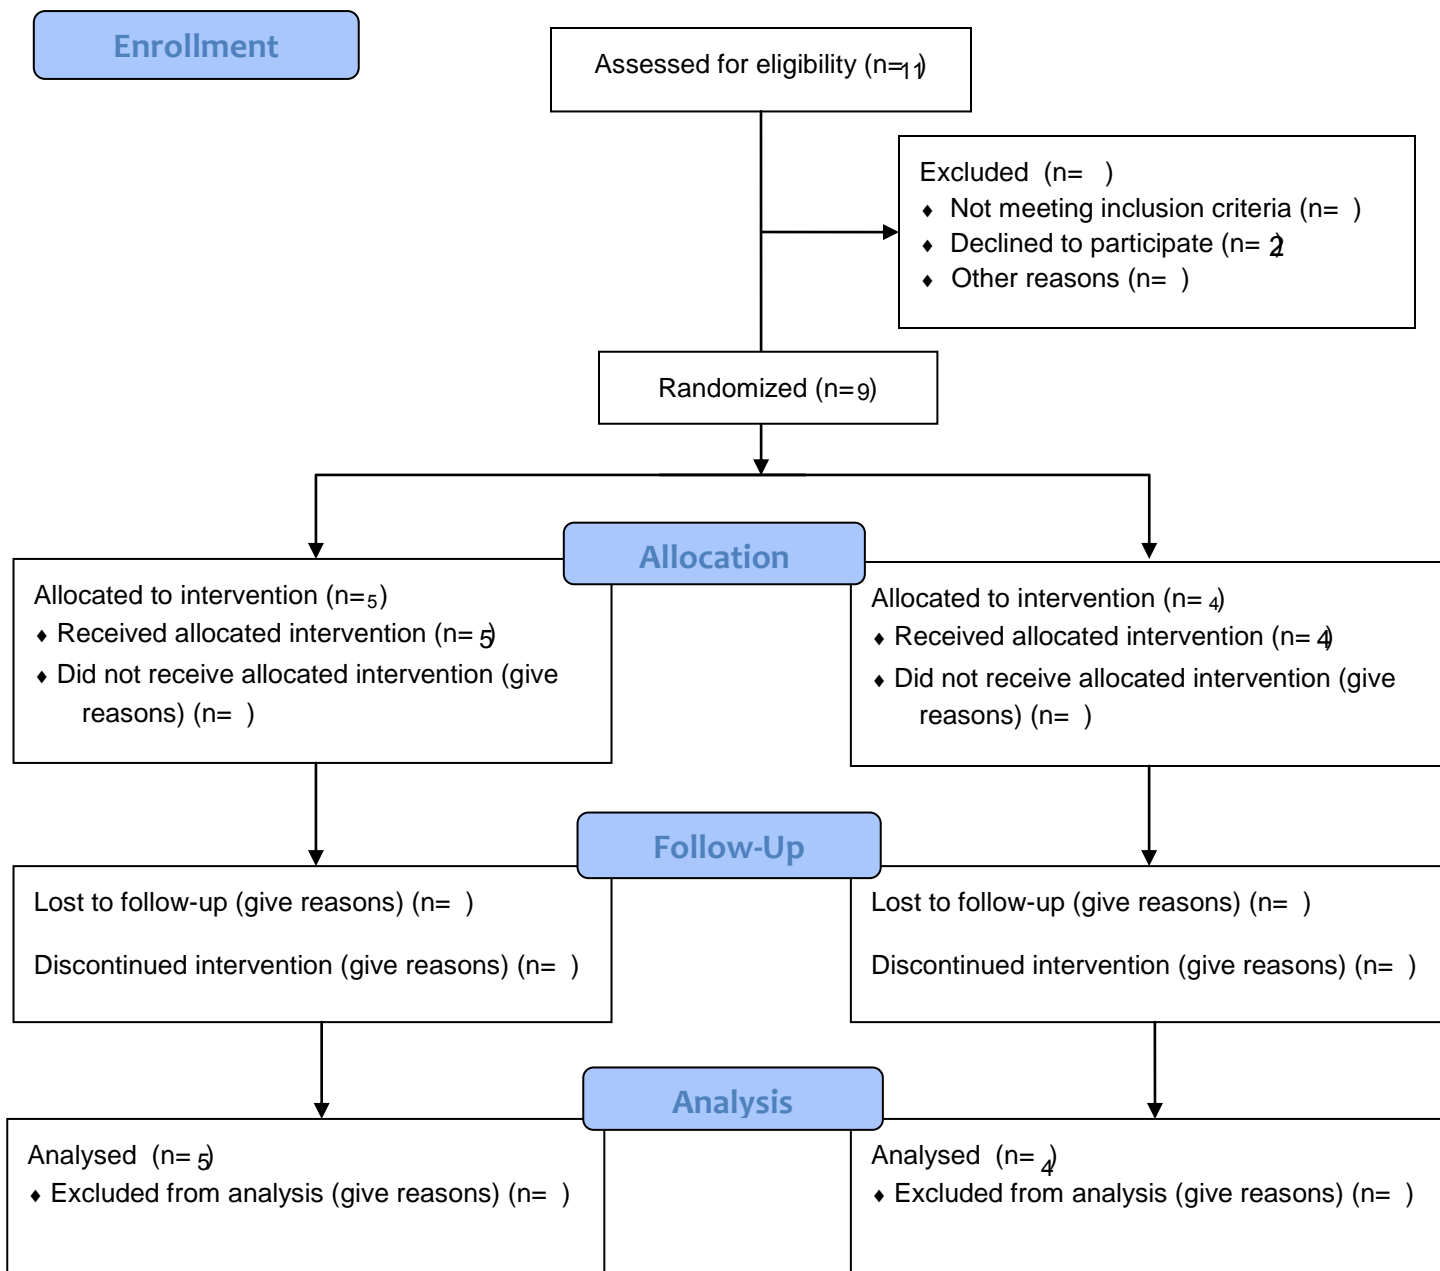

Supplement: pone.0190556.s001.pdf [file pone.0190556.s001.pdf]
