# Supplementary material for: Regional cerebral effects of ketone body infusion with 3-hydroxybutyrate in humans: Reduced glucose uptake, unchanged oxygen consumption and increased blood flow by positron emission tomography. A randomized, controlled trial
Source: PubMed Central journal article supplement (PMC5830038; doi:10.1371/journal.pone.0190556), 2018-02-28
Supplement: pone.0190556.s002.pdf [file pone.0190556.s002.pdf]

| ID-ID | visit | CMRglu_Froi | CMRglu_pari | CMRglu_tem | CMRglu_occi |
|-------|-------|-------------|-------------|------------|-------------|
| 1     | 1     | 31,47       | 29,54       | 26,59      | 25,89       |
| 1     | 2     | 19,89       | 18,82       | 16,86      | 16,11       |
| 2     | 2     | 21,39       | 20,42       | 18,10      | 20,60       |
| 2     | 1     | 19,89       | 19,24       | 17,91      | 20,07       |
| 3     | 1     | 24,26       | 22,58       | 19,58      | 21,34       |
| 3     | 2     | 21,17       | 19,73       | 17,69      | 18,60       |
| 4     | 1     | 21,47       | 19,39       | 17,46      | 17,81       |
| 4     | 2     | 20,52       | 19,06       | 17,30      | 18,34       |
| 5     | 2     | 30,46       | 29,11       | 25,89      | 27,28       |
| 5     | 1     | 25,91       | 24,90       | 21,85      | 25,03       |
| 6     | 2     | 22,50       | 21,10       | 19,46      | 21,43       |
| 6     | 1     | 19,27       | 18,34       | 15,61      | 18,07       |
| 7     | 2     | 24,91       | 23,72       | 21,39      | 23,12       |
| 7     | 1     | 23,82       | 22,86       | 20,16      | 21,31       |
| 8     | 1     | 23,73       | 22,62       | 20,02      | 21,38       |
| 8     | 2     | 18,42       | 17,66       | 15,42      | 16,01       |
| 9     | 2     | 18,03       | 17,76       | 16,38      | 17,75       |
| 9     | 1     | 17,46       | 17,72       | 16,23      | 18,07       |

| CMRglu_grey | Flow_Fronta | Flow_parieta | Flow_tempo | Flow_occipit | Flow_grey | CMRo2_Fron |
|-------------|-------------|--------------|------------|--------------|-----------|------------|
| 29,19       | 38,71       | 37,54        | 33,51      | 36,53        | 36,99     | 160,92     |
| 18,47       | 65,36       | 61,70        | 55,64      | 57,76        | 61,32     | 123,73     |
| 20,34       | 34,32       | 35,10        | 30,47      | 37,98        | 34,18     | 119,11     |
| 19,32       | 47,15       | 46,12        | 40,19      | 48,30        | 45,55     | 117,07     |
| 22,43       | 46,87       | 44,77        | 38,21      | 42,35        | 43,85     | 130,09     |
| 19,71       | 55,89       | 52,91        | 49,05      | 51,99        | 53,13     | 123,56     |
| 19,57       | 43,91       | 41,21        | 36,62      | 40,70        | 41,19     | 126,44     |
| 19,15       | 46,50       | 44,59        | 39,94      | 44,04        | 44,24     | 111,93     |
| 28,74       | 47,07       | 46,37        | 42,16      | 47,24        | 45,87     | 129,26     |
| 24,68       | 61,02       | 59,74        | 53,66      | 59,46        | 58,93     | 143,65     |
| 21,33       | 37,49       | 37,85        | 34,17      | 43,23        | 37,58     | 111,85     |
| 18,06       | 52,73       | 51,49        | 45,14      | 52,18        | 50,65     | 132,13     |
| 23,64       | 47,50       | 46,76        | 42,65      | 48,77        | 46,42     | 136,54     |
| 22,49       | 58,18       | 55,88        | 51,27      | 54,49        | 55,67     | 132,17     |
| 22,37       | 49,51       | 48,43        | 42,84      | 50,49        | 47,93     | 117,63     |
| 17,30       | 54,64       | 52,79        | 47,78      | 54,48        | 52,69     | 124,24     |
| 17,55       | 29,11       | 30,30        | 27,44      | 32,73        | 29,47     | 116,40     |
| 17,32       | 46,40       | 47,03        | 44,01      | 48,24        | 46,24     | 122,06     |

| CMRo2_pari | CMRo2_tem | CMRo2_occ | CMRo2_grey |
|------------|-----------|-----------|------------|
| 161,60     | 144,70    | 172,26    | 158,97     |
| 125,51     | 116,57    | 136,74    | 124,27     |
| 126,30     | 114,85    | 141,66    | 122,98     |
| 117,64     | 113,21    | 127,23    | 117,71     |
| 136,65     | 110,44    | 149,76    | 129,95     |
| 122,86     | 111,41    | 135,68    | 122,27     |
| 124,23     | 112,73    | 133,79    | 123,89     |
| 108,71     | 97,87     | 118,21    | 108,90     |
| 136,64     | 122,35    | 147,30    | 132,01     |
| 152,23     | 134,48    | 167,33    | 146,95     |
| 114,02     | 104,43    | 126,08    | 112,58     |
| 136,48     | 124,89    | 151,57    | 134,12     |
| 135,56     | 116,69    | 142,14    | 132,69     |
| 133,28     | 120,61    | 137,89    | 130,65     |
| 123,00     | 112,56    | 130,37    | 119,41     |
| 120,72     | 113,03    | 123,28    | 120,84     |
| 122,70     | 114,98    | 136,60    | 120,08     |
| 130,25     | 121,77    | 153,84    | 127,84     |
